# Supplementary material for: Somatic loss of estrogen receptor beta and p53 synergize to induce breast tumorigenesis
Source: PubMed Central journal article supplement (PMC5494907; doi:10.1186/s13058-017-0872-z), 2017-07-03
Supplement: 13058_2017_872_MOESM1_ESM.pdf [file 13058_2017_872_MOESM1_ESM.pdf]

Table S1

Oligonucleotides used in genotyping (in 5' to 3' direction)

|               |                          |
|---------------|--------------------------|
| <i>ERβ</i>    |                          |
| ISP           | AAAGGTATGCTTATGTCCGGTGGG |
| BIASP         | GTGGATGCCTATGATCACTGTGGA |
| <i>p53</i>    |                          |
| p53-int1-FW   | CACAAAAACAGGTTAAACCCAG   |
| p53-int1-RV   | AGCACATAGGAGGCAGAGAC     |
| p53-int10-FW  | AAGGGGTATGAGGGACAAGG     |
| p53-int10-RV  | GAAGACAGAAAAGGGGAGGG     |
| <i>K14Cre</i> |                          |
| oIMR1084      | GCGGTCTGGCAGTAAAACTATC   |
| oIMR1085      | GTGAAACAGCATTGCTGTCACTT  |

Oligonucleotides used in RT-PCR

|               |                       |
|---------------|-----------------------|
| ERβ exon 2 FW | GCCAATCATCGCTTCTCTAT  |
| ERβ exon 5 RV | GGCACTTCTCTGTCTTCGTA  |
| ERβ exon 3 FW | GCCAGCCCTGTTACTAGTCC  |
| ERβ exon 3 RV | TCACAGGACCAGACACCGTA  |
| ERβ exon 3 FW | GGTTGTGCCAGCCCTGTTA   |
| ERβ exon 3 RV | CAGGACCAGACACCGTAATGA |
| P53 FW        | ACTCCAGCTACCTGAAGACCA |
| P53 RV        | ACCCTATGAGGGCCCAAGAT  |
