# Supplementary material for: Somatic loss of estrogen receptor beta and p53 synergize to induce breast tumorigenesis
Source: PubMed Central journal article supplement (PMC5494907; doi:10.1186/s13058-017-0872-z), 2017-07-03
Supplement: 13058_2017_872_MOESM3_ESM.pdf [file 13058_2017_872_MOESM3_ESM.pdf]

Figure S2

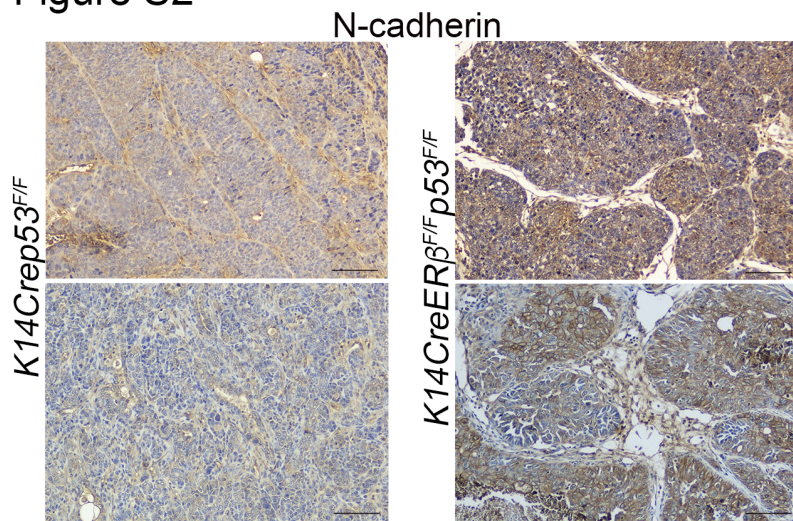

**Supplementary Figure 2. Expression of N-cadherin in mammary tumors from *K14Cre p53<sup>F/F</sup>* and *K14Cre ERβ<sup>F/F</sup> p53<sup>F/F</sup>* female mice.** Representative tumor sections from *K14Cre p53<sup>F/F</sup>* and *K14Cre ERβ<sup>F/F</sup> p53<sup>F/F</sup>* female mice were stained with an antibody against N-cadherin. Scale bars 100 μm.
